# Supplementary material for: Transcription Factor NFE2L1 Decreases in Glomerulonephropathies after Podocyte Damage
Source: Cells. 2023 Aug 29;12(17):2165. doi: 10.3390/cells12172165 (PMC10487238; doi:10.3390/cells12172165)
Supplement: Supplementary file 1 [file cells-12-02165-s001.zip › cells-2433823-supplementary.xlsx]

## Sheet: Sheet 1
CaseID	RenalDx	Image	NumberOfGloms	meanGlomArea	NumberOfPodocytes	meanNQO1GlomArea	meanNQO1GlomAreaPrc	NumofsmallNQO1aggregates	PodocyteperGlom	meanOfmeanNQO1Intensity	meanOfmeanNRF2Intensity	meanOfmeanNRF1Intensity	PodomeanNucleusArea	meanOFmeanPodoNuc.p57	meanOFmeanPodoNuc.NRF2	meanOFmeanPodoNuc.NRF1	meanOFmeanPodoNuc.NQO1
066-SR954	FSGS	066-SR954-p57,Nrf2(ab137550),Nrf1(CST),Nqo1(HPA).czi	34	21123.8	899	311.08	1.76889	34	26.4412	2214.7	683.226	1704.59	26.3745	3249.25	875.46	1217.47	746.413
067-SR954	FSGS	067-SR954-p57,Nrf2(ab137550),Nrf1(CST),Nqo1(HPA).czi	14	20050.3	87	1126.86	5.52683	2	6.21429	2471.15	681.59	604.556	23.6317	2073.64	835.69	790.832	1840.92
068-SR954	FSGS	068-SR954-p57,Nrf2(ab137550),Nrf1(CST),Nqo1(HPA).czi	28	15228.6	385	1695.26	11.9773	6	13.75	2747.96	816.223	1104.43	20.9528	3391.15	910.877	1067.87	2063.45
069-SR954	FSGS	069-SR954-p57,Nrf2(ab137550),Nrf1(CST),Nqo1(HPA).czi	16	21773.8	332	1174.18	6.45889	6	20.75	2497.28	571.964	549.924	21.5838	3291.2	588.683	794.516	1430.64
070-SR954	FSGS	070-SR954-p57,Nrf2(ab137550),Nrf1(CST),Nqo1(HPA).czi	9	20869.7	252	4249.91	16.7982	3	28	2906.16	573.926	1071.06	26.0523	3695.95	882.586	1730.22	1864.81
071-SR954	FSGS	071-SR954-p57,Nrf2(ab137550),Nrf1(CST),Nqo1(HPA).czi	10	17900.5	41	1957.66	7.5883	4	4.1	2793.2	670.73	532.008	26.036	2978.36	895.237	910.957	2942.89
072-SR954	FSGS	072-SR954-p57,Nrf2(ab137550),Nrf1(CST),Nqo1(HPA).czi	22	14430.9	351	2708.44	19.4616	0	15.9545	2891.61	842.11	734.279	22.1837	3796.28	1014.12	1002.21	1989.38
073-SR954	FSGS	073-SR954-p57,Nrf2(ab137550),Nrf1(CST),Nqo1(HPA).czi	4	34592.1	62	356.1	0.957	4	15.5	1878.51	610.519	599.538	25.0549	2946.54	724.385	740.465	830.314
074-SR954	FSGS	074-SR954-p57,Nrf2(ab137550),Nrf1(CST),Nqo1(HPA).czi	8	31472.7	57	0	0	8	7.125				20.8665	2815.78	638.741	645.504	433.412
075-SR954	FSGS	075-SR954-p57,Nrf2(ab137550),Nrf1(CST),Nqo1(HPA).czi	4	43378.1	69	2133.33	6.32052	2	17.25	2549.75	378.099	534.727	28.8771	3099.39	497.725	747.293	1421.77
076-SR954	FSGS	076-SR954-p57,Nrf2(ab137550),Nrf1(CST),Nqo1(HPA).czi	26	15206.5	732	4160.53	31.1788	2	28.1538	3000.94	626.171	792.125	21.3225	4155.82	760.25	1182.81	2556.99
077-SR954	FSGS	077-SR954-p57,Nrf2(ab137550),Nrf1(CST),Nqo1(HPA).czi	20	28223	49	0.378735	0.001195	20	2.45	1867.9	304.366	212.2	24.0683	1334.64	284.982	263.637	362.763
078-SR954	FSGS	078-SR954-p57,Nrf2(ab137550),Nrf1(CST),Nqo1(HPA).czi	8	20655.2	58	141.807	0.575638	6	7.25	2470.47	415.484	359.733	23.9548	1331.89	500.385	362.335	823.106
079-SR954	FSGS	079-SR954-p57,Nrf2(ab137550),Nrf1(CST),Nqo1(HPA).czi	2	86020.4	11	278.657	0.3237	2	5.5	2286.27	541.072	580.47	30.8284	1720.81	506.476	567.813	1034.78
080-SR954	FSGS	080-SR954-p57,Nrf2(ab137550),Nrf1(CST),Nqo1(HPA).czi	26	21951.8	244	516.829	2.3913	16	9.38462	2488.62	748.36	834.306	23.6098	2978.28	793.639	1168.22	1278.81
081-SR954	FSGS	081-SR954-p57,Nrf2(ab137550),Nrf1(CST),Nqo1(HPA).czi	30	16571.4	35	1240.74	9.57425	6	1.16667	2695.36	226.244	238.948	24.6927	1951.84	284.412	362.756	1805.12
082-SR954	FSGS	082-SR954-p57,Nrf2(ab137550),Nrf1(CST),Nqo1(HPA).czi	10	31188.6	47	801.573	2.48772	5	4.7	2633.45	395.676	417.652	25.1133	3016.44	369.988	418.932	1414.49
083-SR954	FSGS	083-SR954-p57,Nrf2(ab137550),Nrf1(CST),Nqo1(HPA).czi	40	23795.1	577	1306.41	8.15503	6	14.425	2651.31	410.095	437.595	21.9987	2834.02	533.333	659.308	1632.26
084-SR954	FSGS	084-SR954-p57,Nrf2(ab137550),Nrf1(CST),Nqo1(HPA).czi	16	18741.4	183	1330.7	8.35439	4	11.4375	2656.97	631.821	1497	24.1595	3732.48	713.879	1178.2	1604.61
085-SR954	FSGS	085-SR954-p57,Nrf2(ab137550),Nrf1(CST),Nqo1(HPA).czi	4	29183.3	184	2828.3	7.46615	2	46	2430.93	1157.14	1070.09	24.4978	3702.17	1351.11	1508.11	1394.66
086-SR954	FSGS	086-SR954-p57,Nrf2(ab137550),Nrf1(CST),Nqo1(HPA).czi	32	16380.9	604	3007.75	19.8418	0	18.875	2938.14	573.313	604.396	21.6383	4641.56	835.159	1014.46	2171.08
087-SR954	FSGS	087-SR954-p57,Nrf2(ab137550),Nrf1(CST),Nqo1(HPA).czi	30	18407.1	568	3068.78	16.778	4	18.9333	2540.98	902.751	1599.25	24.7063	4246.29	1189.74	2196.6	1866.68
088-SR954	FSGS	088-SR954-p57,Nrf2(ab137550),Nrf1(CST),Nqo1(HPA).czi	40	12687.4	855	3290.87	27.2388	2	21.375	3512.22	803.88	731.379	19.3285	4610.81	1139.25	1290	2773.44
089-SR954	MCD	089-SR954-p57,Nrf2(ab137550),Nrf1(CST),Nqo1(HPA).czi	20	20004.2	358	1601.44	9.39184	0	17.9	2544.29	1252.71	1754.11	22.785	3674.64	1434.2	1985.08	1707.28
090-SR954	MCD	090-SR954-p57,Nrf2(ab137550),Nrf1(CST),Nqo1(HPA).czi	18	16990.2	247	1127.02	8.38877	5	13.7222	2491.77	603.05	926.91	23.5396	3690.67	695.081	1076.09	1572.52
091-SR954	MCD	091-SR954-p57,Nrf2(ab137550),Nrf1(CST),Nqo1(HPA).czi	6	33477.9	111	1347.17	6.16482	2	18.5	2547.31	802.126	1084.55	24.0673	3309.24	944.742	1448.21	1803.62
092-SR954	MCD	092-SR954-p57,Nrf2(ab137550),Nrf1(CST),Nqo1(HPA).czi	36	23599.7	882	654.566	3.48378	23	24.5	2501.36	491.833	708.985	21.5374	3168.85	678.496	707.392	830.075
093-SR954	MCD	093-SR954-p57,Nrf2(ab137550),Nrf1(CST),Nqo1(HPA).czi	18	26527.1	241	5652.32	24.4774	2	13.3889	3142.75	672.548	973.075	25.97	3216.3	888.746	1221.13	2926.7
094-SR954	MCD	094-SR954-p57,Nrf2(ab137550),Nrf1(CST),Nqo1(HPA).czi	14	21096	357	2616.69	13.4348	0	25.5	2626.2	521.603	633.131	24.4478	4088.18	736.523	868.216	1700.29
095-SR954	MCD	095-SR954-p57,Nrf2(ab137550),Nrf1(CST),Nqo1(HPA).czi	6	15338.2	73	2900.64	20.2082	0	12.1667	3083.31	849.485	944.068	20.7203	3777.14	868.16	1018.87	2419.19
096-SR954	MCD	096-SR954-p57,Nrf2(ab137550),Nrf1(CST),Nqo1(HPA).czi	38	18460.7	1376	990.636	5.82834	16	36.2105	2417.01	841.251	885.164	20.338	5868.52	907.222	1021.64	1380.12
097-SR954	MCD	097-SR954-p57,Nrf2(ab137550),Nrf1(CST),Nqo1(HPA).czi	28	22547.5	494	89.3333	0.423346	28	17.6429	2159.05	1033.49	1652.31	27.5367	3617.21	1030.37	1319.41	829.546
098-SR954	FSGS	098-SR954-p57,Nrf2(ab137550),Nrf1(CST),Nqo1(HPA).czi	4	31146.8	69	3007.19	9.72643	0	17.25	2682.95	557.464	556.044	23.8632	3729.71	827.469	942.07	2293.99
099-SR954	MCD	099-SR954-p57,Nrf2(ab137550),Nrf1(CST),Nqo1(HPA).czi	22	25507	194	20.499	0.0826909	20	8.81818	2890.78	455.911	523.936	24.4396	3109.3	745.536	807.796	1021.45
100-SR954	MCD	100-SR954-p57,Nrf2(ab137550),Nrf1(CST),Nqo1(HPA).czi	5	24811.2	40	542.867	2.07144	4	8	2082.02	812.81	693.712	28.0021	6188.95	861.717	1135.58	1024.44
101-SR954	MCD	101-SR954-p57,Nrf2(ab137550),Nrf1(CST),Nqo1(HPA).czi	18	21746.7	143	1208.85	5.4425	8	7.94444	2195.21	313.773	387.759	24.5242	3476.11	452.961	766.839	1280.96
102-SR954	MCD	102-SR954-p57,Nrf2(ab137550),Nrf1(CST),Nqo1(HPA).czi	26	19996.8	338	1848.56	9.348	3	13	2447.62	276.022	351.848	25.8668	3501.6	411.652	616.046	1606.87
103-SR954	FSGS	103-SR954-p57,Nrf2(ab137550),Nrf1(CST),Nqo1(HPA).czi	26	15730.4	506	3578.25	19.4902	5	19.4615	2661.72	1204.36	1057.35	19.9336	3751.1	1451.65	1490.37	2575.9
104-SR954	FSGS	104-SR954-p57,Nrf2(ab13550),NRF1(CST),Nqo11(HPA)R2.czi	2	35706.6	22	3251.12	9.503	0	11	2368.42	536.989	526.894	22.7079	3879.54	655.452	822.716	1753.75
105-SR954	FSGS	105-SR954-p57,Nrf2(ab137550),Nrf1(CST),Nqo1(HPA).czi	3	35274.1	79	2557.58	7.1245	0	26.3333	2379.14	713.275	592.352	20.305	4961.68	1216.69	786.776	1307.21
106-SR954	FSGS	106-SR954-p57,Nrf2(ab137550),Nrf1(CST),Nqo1(HPA).czi	13	19452.5	300	2148.32	11.8152	4	23.0769	2273.44	1046.91	806.107	26.0373	8402.07	903.392	835.153	1558.52
107-SR954	FSGS	107-SR954-p57,Nrf2(ab137550),Nrf1(CST),Nqo1(HPA).czi	5	32710.2	22	2912.57	9.7664	0	4.4	2528.75	713.323	614.561	20.8435	5490.45	886.458	839.628	2928.86
108-SR954	FSGS	108-SR954-p57,Nrf2(ab13550),NRF1(CST),Nqo11(HPA)R.czi	3	33524.7	12	6700.74	18.6497	0	4	2613.77	446.349	540.782	30.7757	3948.65	586.957	664.518	2178.92
109-SR954	FSGS	109-SR954-p57,Nrf2(ab137550),Nrf1(CST),Nqo1(HPA).czi	4	38497.9	68	6230.85	17.5955	0	17	2539.95	509.476	279.701	26.3336	2926.35	697.059	497.913	1519.34
110-SR954	FSGS	110-SR954-p57,Nrf2(ab137550),Nrf1(CST),Nqo1(HPA).czi	22	11994.3	284	1874.05	16.277	5	12.9091	2671.7	575.563	545.983	18.8317	3671.67	773.268	813.868	1917.75
111-SR954	FSGS	111-SR954-p57,Nrf2(ab137550),Nrf1(CST),Nqo1(HPA).czi	5	26914.1	20	4413.14	16.1085	0	4	2492.21	403.475	490.219	32.2623	5424.99	696.755	1148.15	1650.59
112-SR954	DN	112-SR954-p57,Nrf2(ab137550),Nrf1(CST),Nqo1(HPA).czi	3	35542.4	38	254.45	0.5464	3	12.6667	2006.86	760.607	759.108	21.6937	4939.18	1223.29	944.049	1200.25
113-SR954	DN	113-SR954-p57,Nrf2(ab137550),Nrf1(CST),Nqo1(HPA).czi	14	23363.4	196	5755.53	24.2818	0	14	2844.79	747.946	1175.8	24.7174	4246.41	817.783	1629.49	2641.96
115-SR954	DN	115-SR954-p57,Nrf2(ab137550),Nrf1(CST),Nqo1(HPA).czi	11	26161.2	216	3778.92	15.3149	2	19.6364	2460.14	1014.75	1285.76	23.6728	4115.37	1277.2	1749.09	1859.9
116-SR954	DN	116-SR954-p57,Nrf2(ab137550),Nrf1(CST),Nqo1(HPA).czi	5	15068	59	4475.44	29.9759	0	11.8	3115.57	737.96	758.506	22.8308	6054.31	1018.54	1393.41	2470.94
117-SR954	DN	117-SR954-p57,Nrf2(ab137550),Nrf1(CST),Nqo1(HPA).czi	10	20537.7	59	2470.54	12.5069	0	5.9	2502.71	1069.39	842.022	22.5068	4114.03	1139.01	1092.28	2672.76
118-SR954	DN	118-SR954-p57,Nrf2(ab137550),Nrf1(CST),Nqo1(HPA).czi	12	33889	168	5352.79	16.4783	1	14	2836.42	868.424	1058.74	23.3623	6438.12	1085.62	1522	2460.46
119-SR954	Mes IgA/IgG	119-SR954-p57,Nrf2(ab137550),Nrf1(CST),Nqo1(HPA).czi	12	13331.7	48	1624	12.9105	2	4	2400.19	363.483	1191.44	22.6835	4282.26	421.141	825.657	2247.27
120-SR954	DN	120-SR954-p57,Nrf2(ab137550),Nrf1(CST),Nqo1(HPA).czi	29	13024.2	579	4517.1	35.7249	3	19.9655	3127.6	802.274	996.633	20.9525	4930.07	1007.57	1285.09	2884.15
121-SR954	DN	121-SR954-p57,Nrf2(ab137550),Nrf1(CST),Nqo1(HPA).czi	7	21995.2	26	1614.46	7.94636	2	3.71429	2480.5	803.445	506.85	22.5637	4432.09	1110.51	752.174	2281.78
122-SR954	DN	122-SR954-p57,Nrf2(ab137550),Nrf1(CST),Nqo1(HPA).czi	11	21142	29	217.085	1.4814	8	2.63636	2216.57	711.281	681.667	24.6877	4028.78	716.441	821.462	1368.39
123-SR954	DN	123-SR954-p57,Nrf2(ab137550),Nrf1(CST),Nqo1(HPA).czi	7	19801.4	17	3104.17	13.5721	3	2.42857	2449.28	994.346	1056.28	25.3765	4190.23	1159.77	1623.26	2891.65
124-SR954	DN	124-SR954-p57,Nrf2(ab137550),Nrf1(CST),Nqo1(HPA).czi	3	19982.9	24	317.831	1.62847	3	8	2060.73	658.223	779.589	25.2513	5210.32	1098	1029.32	826.415
125-SR954	DN	125-SR954-p57,Nrf2(ab137550),Nrf1(CST),Nqo1(HPA).czi	9	30412.9	400	17167.7	56.2031	0	44.4444	3534.82	1084.28	1241.15	20.0441	6317.35	1632.37	2417.19	3729.86
126-SR954	DN	126-SR954-p57,Nrf2(ab137550),Nrf1(CST),Nqo1(HPA).czi	13	26942.6	75	8652.16	30.609	0	5.76923	2999.62	608.238	851.834	24.0105	4161.42	728.153	1031.45	3066.92
127-SR954	DN	127-SR954-p57,Nrf2(ab137550),Nrf1(CST),Nqo1(HPA).czi	11	29585.1	41	600.473	2.60048	8	3.72727	2107.19	672.871	767.96	21.5529	3700.39	1222.24	765.51	1270.86
128-SR954	DN	128-SR954-p57,Nrf2(ab137550),Nrf1(CST),Nqo1(HPA).czi	3	33637.3	49	7441.52	23.0775	0	16.3333	2550.34	570.425	904.848	23.7643	7014.01	611.769	1291.05	2591.45
129-SR954	DN	129-SR954-p57,Nrf2(ab137550),Nrf1(CST),Nqo1(HPA).czi	2	29125.9	18	1847.65	6.5609	0	9	2318.31	540.02	451.109	27.5651	4379.43	539.8	612.691	1317.93
130-SR954	DN	130-SR954-p57,Nrf2(ab13550),NRF1(CST),Nqo11(HPA)R.czi	13	14876	33	444.516	3.47758	11	2.53846	2154.91	327.258	453.742	26.8044	4820.44	418.975	579.809	1227.76
131-SR954	DN	131-SR954-p57,Nrf2(ab137550),Nrf1(CST),Nqo1(HPA).czi	13	28834	522	4129.19	13.8585	1	40.1538	2621.57	795.24	1135.76	20.9221	4027.6	1163.74	1671.57	1751.79
132-SR954	DN	132-SR954-p57,Nrf2(ab137550),Nrf1(CST),Nqo1(HPA).czi	9	26108.9	24	915.102	4.35051	3	2.66667	2381	599.639	745.498	22.6856	3211.03	704.183	964.669	1827.72
1327-01No	Normal Kidney	1327-01NormalC-SR954-p57,Nrf2(ab137550),Nrf1(CST),Nqo1(HPA) .czi	156	20408.5	5131	12145.6	60.7925	1	32.891	4188.3	1137.94	2043.47	25.9961	7683.24	1155.18	3789.47	5219.32
1327-02-N	Normal Kidney	1327-02-NormalC-SR954-p57,Nrf2(ab137550),Nrf1(CST),Nqo1(HPA.czi	252	22783	12173	16879.8	74.1366	0	48.3056	4768.49	837.486	1857.2	26.2977	9387.86	1033.2	3394.56	6107.7
1327-03No	Normal Kidney	1327-03NormalCSR954-p57,Nrf2(ab137550),Nrf1(CST),Nqo1(HPA) .czi	170	26575.1	11120	16829.5	62.9711	0	65.4118	4028.42	804.298	1855.89	23.7187	8711.97	1062.41	3130.41	4076.5
1327bNorm	Normal Kidney	1327bNormalC-SR954-p57,Nrf2(ab137550),Nrf1(CST),Nqo1(HPA.czi	139	19516.4	5612	13735.8	70.6255	0	40.3741	4277.11	710.531	1855.53	24.6795	10756.9	825.1	3288.72	5308.85
133-SR954	DN	133-SR954-p57,Nrf2(ab137550),Nrf1(CST),Nqo1(HPA).czi	17	18034.5	101	1438.87	8.61031	2	5.94118	2426.13	836.753	757.432	21.0147	4754.95	979.463	907.593	1440.17
134-SR954	DN	134-SR954-p57,Nrf2(ab137550),Nrf1(CST),Nqo1(HPA).czi	7	23073.4	141	1017.13	4.42186	3	20.1429	2220.42	848.691	1016.18	23.7253	4815	1250.23	1495.33	1342.38
135-SR954	DN	135-SR954-p57,Nrf2(ab137550),Nrf1(CST),Nqo1(HPA).czi	38	19231.8	140	3967.04	21.057	0	3.68421	3001.2	794.69	487.043	26.7921	6043.98	1120.46	1098.12	2305.33
136-SR954	DN	136-SR954-p57,Nrf2(ab137550),Nrf1(CST),Nqo1(HPA).czi	12	22834.2	139	2156.93	10.444	1	11.5833	2763.19	853.49	616.77	20.222	4516.63	1651.67	1145.79	1635.79
137-SR954	DN	137-SR954-p57,Nrf2(ab137550),Nrf1(CST),Nqo1(HPA).czi	22	29380.1	224	2071.94	8.29289	7	10.1818	2359.52	1216.53	1165.09	25.6522	6190.31	1429.18	1806.46	1524.55
138-SR954	DN	138-SR954-p57,Nrf2(ab137550),Nrf1(CST),Nqo1(HPA).czi	12	19866	63	1607.38	9.58679	3	5.25	2512.67	839.869	694.04	18.5504	4083.16	1075.25	944.395	2482.41
139-SR954	MPGN	139-SR954-p57,Nrf2(ab137550),Nrf1(CST),Nqo1(HPA).czi	2	31163.2	22	3304.49	10.513	0	11	2548.8	1069.86	830.989	23.2935	2318.85	1729.86	1406.53	1625.65
141-SR954	FSGS	141-SR954-p57,Nrf2(ab137550),Nrf1(CST),Nqo1(HPA).czi	59	34742.4	1497	31.3486	0.0943746	59	25.3729	2035.74	1453.88	3695.68	27.3092	7674.82	1056.82	1930.68	930.693
143-SR954	Mes IgA/IgG	143-SR954-p57,Nrf2(ab137550),Nrf1(CST),Nqo1(HPA).czi	5	16844.1	44	1664.12	10.0342	1	8.8	2454.42	572.51	377.669	19.4955	2765.27	596.635	432.942	2250.6
144-SR954	FSGS	144-SR954-p57,Nrf2(ab137550),Nrf1(CST),Nqo1(HPA).czi	2	16260.6	11	2188.05	15.5307	1	5.5	2294.29	651.596	651.531	21.169	2430.24	918.543	747.732	2396.63
145-SR954	Mes IgA/IgG	145-SR954-p57,Nrf2(ab137550),Nrf1(CST),Nqo1(HPA).czi	4	55104.8	49	5579.49	10.17	1	12.25	2532.49	557.604	618.206	26.1694	2237.15	936.624	704.248	1418.77
146-SR954	Mes IgA/IgG	146-SR954-p57,Nrf2(ab137550),Nrf1(CST),Nqo1(HPA).czi	1	27167.6	16	0.7729	0.0028	1	16	1863.25	857.5	608.75	22.0029	5360.53	773.809	849.036	649.266
147-SR954	Mes IgA/IgG	147-SR954-p57,Nrf2(ab137550),Nrf1(CST),Nqo1(HPA).czi	8	26894.1	197	481.451	1.84934	7	24.625	2111.99	520.756	494.399	21.3016	2624.28	570.623	527.487	972.051
148-SR954	Mes IgA/IgG	148-SR954-p57,Nrf2(ab137550),Nrf1(CST),Nqo1(HPA).czi	23	12879.5	468	1930.21	16.0017	3	20.3478	2415.82	836.672	693.858	20.9094	3008.68	974.294	892.251	1618.17
149-SR954	Mes IgA/IgG	149-SR954-p57,Nrf2(ab137550),Nrf1(CST),Nqo1(HPA).czi	9	18743.8	224	3325.33	17.07	1	24.8889	2513.63	1107.38	771.168	22.1076	3459.65	1270.85	1070.99	2125.54
150-SR954	Mes IgA/IgG	150-SR954-p57,Nrf2(ab137550),Nrf1(CST),Nqo1(HPA).czi	8	23082.2	87	770.694	3.58724	3	10.875	2325.57	915.482	1064.02	22.7071	4122.67	905.345	976.14	1240.72
151-SR954	Mes IgA/IgG	151-SR954-p57,Nrf2(ab137550),Nrf1(CST),Nqo1(HPA).czi	22	23079.7	263	3646.72	16.3294	2	11.9545	2597.1	980.372	852.104	22.8848	5441.11	1214.43	1119.29	2165.38
152-SR954	Mes IgA/IgG	152-SR954-p57,Nrf2(ab137550),Nrf1(CST),Nqo1(HPA).czi	18	13869.5	86	1608.32	13.0415	3	4.77778	2411.51	887.294	879.134	24.8346	6400.54	1152.57	1362.06	1898.38
153-SR954	Mes IgA/IgG	153-SR954-p57,Nrf2(ab137550),Nrf1(CST),Nqo1(HPA).czi	4	21503.7	64	1115.44	5.7993	1	16	2266.91	1123.12	1446.22	22.4614	3738.94	1120.29	1827.79	1498.13
154-SR954	Mes IgA/IgG	154-SR954-p57,Nrf2(ab137550),Nrf1(CST),Nqo1(HPA).czi	14	14224	174	3407.61	24.7735	0	12.4286	2749.28	838.628	1076.22	22.8842	6608.16	1106.3	1877.03	2355.1
155-SR954	Mes IgA/IgG	155-SR954-p57,Nrf2(ab137550),Nrf1(CST),Nqo1(HPA).czi	32	15962.3	908	2787.39	17.6751	2	28.375	2586.35	1115.63	1196.02	21.5517	6905.09	1324.67	1888.55	2105.09
156-SR954	Mes IgA/IgG	156-SR954-p57,Nrf2(ab137550),Nrf1(CST),Nqo1(HPA).czi	2	29190.7	64	1114.66	3.7876	1	32	2305.29	813.305	1139.55	21.9159	3921.29	1279.95	1568.49	1127.45
157-SR954	Mes IgA/IgG	157-SR954-p57,Nrf2(ab137550),Nrf1(CST),Nqo1(HPA).czi	7	16531.8	120	3817.43	21.4771	0	17.1429	2597.6	884.636	1194.36	22.5521	7297.23	1135.61	1930.19	2513.86
158-SR954	Mes IgA/IgG	158-SR954-p57,Nrf2(ab137550),Nrf1(CST),Nqo1(HPA).czi	17	21272.8	202	5196.37	24.4938	3	11.8824	2746.14	427.433	640.62	27.944	7093.17	550.982	1131.42	2282.7
159-SR954	Mes IgA/IgG	159-SR954-p57,Nrf2(ab137550),Nrf1(CST),Nqo1(HPA).czi	17	17521.4	226	791.394	5.73091	7	13.2941	2263.41	976.287	1077.95	20.7026	4685.89	1336.49	1342.32	1314.32
160-SR954	Mes IgA/IgG	160-SR954-p57,Nrf2(ab137550),Nrf1(CST),Nqo1(HPA).czi	11	17469.9	190	3531.55	21.3457	0	17.2727	2679.81	1017.84	1002.2	20.3694	7290.47	1214.71	1423.61	2728.66
162-SR954	Mes IgA/IgG	162-SR954-p57,Nrf2(ab137550),Nrf1(CST),Nqo1(HPA).czi	9	28680.3	192	4415.61	15.9321	0	21.3333	2532.96	686.767	1065.94	23.6867	5410.17	845.613	1727.98	2057.4
163-SR954	Mes IgA/IgG	163-SR954-p57,Nrf2(ab137550),Nrf1(CST),Nqo1(HPA).czi	12	17828.6	4	2052.9	12.8206	2	0.333333	2370	644.026	1083.46	27.4134	3259.47	1342.76	1489.51	2687.06
164-SR954	Mes IgA/IgG	164-SR954-p57,Nrf2(ab137550),Nrf1(CST),Nqo1(HPA).czi	14	22884.2	66	368.293	1.78264	8	4.71429	2134.12	645.954	618.734	24.6949	4749.68	604.288	517.231	974.995
165-SR954	Mes IgA/IgG	165-SR954-p57,Nrf2(ab137550),Nrf1(CST),Nqo1(HPA).czi	21	19745.7	120	1522.65	7.97876	5	5.71429	2266.93	961.879	670.211	28.6377	6689.25	1305.81	1001.38	1350.54
166-SR954	Mes IgA/IgG	166-SR954-p57,Nrf2(ab137550),Nrf1(CST),Nqo1(HPA).czi	35	16719.5	287	2159.06	13.1919	7	8.2	2350.6	1050.2	928.302	20.0927	5559.26	1067.43	1229.01	2569.12
167-SR954	Mes IgA/IgG	167-SR954-p57,Nrf2(ab137550),Nrf1(CST),Nqo1(HPA).czi	15	12060.9	40	768.469	6.56305	12	2.66667	2203.55	781.301	382.293	23.8682	2629.37	512.397	335.947	1506.46
168-SR954	Mes IgA/IgG	168-SR954-p57,Nrf2(ab137550),Nrf1(CST),Nqo1(HPA).czi	22	16299.1	209	4622.63	31.419	0	9.5	2986.04	808.029	709.805	22.265	5606.27	1076.01	1141.11	3287.05
169-SR954	Mes IgA/IgG	169-SR954-p57,Nrf2(ab137550),Nrf1(CST),Nqo1(HPA).czi	38	18452.2	579	4201.81	23.6606	10	15.2368	#NUM!	#NUM!	#NUM!	24.1148	4888.23	1178.83	1120.32	2154.19
170-SR954	Mes IgA/IgG	170-SR954-p57,Nrf2(ab137550),Nrf1(CST),Nqo1(HPA) .czi	5	17591.3	55	19.863	0.11128	5	11	2009.76	763.67	570.519	27.1117	4527.23	1189.28	657.008	686.236
171-SR954	Mes IgA/IgG	171-SR954-p57,Nrf2(ab137550),Nrf1(CST),Nqo1(HPA) .czi	13	21076.1	57	1055.04	5.43775	2	4.38462	2434.6	606.45	388.828	20.7418	3528.9	746.165	462.341	1202.64
172-SR954	Mes IgA/IgG	172-SR954-p57,Nrf2(ab137550),Nrf1(CST),Nqo1(HPA).czi	12	22243.9	85	1557.82	8.02993	1	7.08333	2528.72	694.287	743.325	24.6048	5776.22	830.202	884.806	1862.34
173-SR954	Mes IgA/IgG	173-SR954-p57,Nrf2(ab137550),Nrf1(CST),Nqo1(HPA).czi	8	40017.8	58	5483.44	16.0844	2	7.25	2374.89	1017.07	785.681	22.8407	5640.92	983.395	1060.28	2464.81
174-SR954	Mes IgA/IgG	174-SR954-p57,Nrf2(ab137550),Nrf1(CST),Nqo1(HPA).czi	12	26378.5	125	2520.2	9.8741	2	10.4167	2358.5	831.26	725.311	22.3252	5487.68	871.129	955.545	2049.36
175-SR954	Mes IgA/IgG	175-SR954-p57,Nrf2(ab137550),Nrf1(CST),Nqo1(HPA) .czi	18	18378.6	50	5442.36	29.3311	0	2.77778	2959.89	676.764	1032.91	23.893	4492.65	572.344	681.28	2736.06
176-SR954	Mes IgA/IgG	176-SR954-p57,Nrf2(ab137550),Nrf1(CST),Nqo1(HPA).czi	3	21963	33	9550.66	43.5167	0	11	3157.53	536.793	776.958	25.1477	5507.5	628.868	1177.4	3853.47
177-SR954	Mes IgA/IgG	177-SR954-p57,Nrf2(ab137550),Nrf1(CST),Nqo1(HPA).czi	18	18955.1	29	847.654	5.39379	14	1.61111	2152.36	732.699	565.521	27.6373	5060.74	1117.3	1077	1269.14
178-SR954	Mes IgA/IgG	178-SR954-p57,Nrf2(ab137550),Nrf1(CST),Nqo1(HPA).czi	28	14918	456	6452.4	46.9548	0	16.2857	3906.74	749.349	967.941	24.619	6966.95	1036.17	1709.87	4496.36
179-SR954	MPGN	179-SR954-p57,Nrf2(ab137550),Nrf1(CST),Nqo1(HPA) .czi	15	17379.6	37	1643.08	11.6759	3	2.46667	2458.68	794.595	828.663	20.2996	5389.48	1348.51	1880.03	2249.55
180-SR954	MPGN	180-SR954-p57,Nrf2(ab137550),Nrf1(CST),Nqo1(HPA).czi	15	21386.9	62	1306.79	6.88383	8	4.13333	2225.05	586.285	644.303	26.3762	6257.85	612.32	939.142	1514.85
181-SR954	MPGN	181-SR954-p57,Nrf2(ab137550),Nrf1(CST),Nqo1(HPA) .czi	6	30251.6	18	943.186	4.19698	2	3	2422.11	670.311	487.068	26.5002	4825.63	673.325	490.26	1071.62
182-SR954	MPGN	182-SR954-p57,Nrf2(ab137550),Nrf1(CST),Nqo1(HPA).czi	12	27529.2	57	944.567	4.34532	4	4.75	2410.4	568.445	644.608	22.7668	6059.52	530.702	822.421	1863.78
183-SR954	MPGN	183-SR954-p57,Nrf2(ab137550),Nrf1(CST),Nqo1(HPA) .czi	30	28309.5	181	173.373	0.92563	29	6.03333	2145.17	704.904	979.1	26.9747	2886.98	672.772	588.657	829.014
184-SR954	MPGN	184-SR954-p57,Nrf2(ab137550),Nrf1(CST),Nqo1(HPA).czi	9	16547.6	28	1991.72	15.0968	4	3.11111	2237.33	635.807	531.611	27.0638	3474.05	835.784	768.379	1770.9
185-SR954	MPGN	185-SR954-p57,Nrf2(ab137550),Nrf1(CST),Nqo1(HPA) .czi	6	28585.8	80	50.5554	0.182667	6	13.3333	2029.29	448.33	453.961	24.5684	2862.06	657.566	526.404	617.294
186-SR954	MPGN	186-SR954-p57,Nrf2(ab137550),Nrf1(CST),Nqo1(HPA).czi	9	18521	18	277.742	1.7431	5	2	2054.75	782.585	742.878	27.1844	6506.98	1121.43	1123.24	996.17
187-SR954	MPGN	187-SR954-p57,Nrf2(ab137550),Nrf1(CST),Nqo1(HPA) .czi	10	22273.5	34	1080.75	4.50673	3	3.4	2530.99	483.368	644.693	20.0675	3948.92	606.598	711.137	1431.01
188-SR954	MPGN	188-SR954-p57,Nrf2(ab137550),Nrf1(CST),Nqo1(HPA).czi	18	43054.7	423	234.69	0.610894	7	23.5	2925.88	1075.13	2087.56	23.6662	6493.62	826.739	1412.56	863.493
189-SR954	Mes IgA/IgG	189-SR954-p57,Nrf2(ab137550),Nrf1(CST),Nqo1(HPA) .czi	15	25608.6	233	2.23292	0.00982667	15	15.5333	2072.98	1672.6	1124.15	23.7929	3764.87	948.257	796.162	481.959
190-SR954	MPGN	190-SR954-p57,Nrf2(ab137550),Nrf1(CST),Nqo1(HPA).czi	11	28598.8	95	3164.96	12.0134	0	8.63636	2556.32	386.839	453.995	25.7547	4481.46	646.434	895.736	1353.83
KEH002Nor	Normal Kidney	KEH002NormalC-SR954-p57,Nrf2(ab137550),Nrf1(CST),Nqo1(HPA) .czi	35	26058.1	672	14551.3	56.0191	0	19.2	3398.99	329.382	1715.68	24.8395	2101.78	476.636	2860.08	4945.66
KEH003Nor	Normal Kidney	KEH003NormalC-SR954-p57,Nrf2(ab137550),Nrf1(CST),Nqo1(HPA) .czi	26	20589	699	7658.21	38.2117	0	26.8846	2976.58	547.693	2370.87	23.4405	2889.11	646.319	3036.82	2915.19
NIP1Norma	Normal Kidney	NIP1NormalC-SR954-p57,Nrf2(ab137550),Nrf1(CST),Nqo1(HPA) .czi	111	25601.5	3364	7441.99	29.1249	1	30.3063	3073.39	693.881	1142.83	22.5481	9400.07	799.143	2005.39	2857.29
NIP2Norma	Normal Kidney	NIP2NormalC-SR954-p57,Nrf2(ab137550),Nrf1(CST),Nqo1(HPA) .czi	230	23414.3	8732	9111.33	38.6073	0	37.9652	3172.89	579.496	1291.21	22.3322	8991.16	778.618	2402.21	3006.74
NIP3Norma	Normal Kidney	NIP3NormalC-SR954-p57,Nrf2(ab137550),Nrf1(CST),Nqo1(HPA.czi	97	14656.5	2731	6303.69	43.045	0	28.1546	3581.93	379.144	703.663	21.35	9764.6	482.059	1282.31	4197.22
NIp4aNorm	Normal Kidney	NIp4aNormalC-SR954-p57,Nrf2(ab137550),Nrf1(CST),Nqo1(HPA) .czi	76	14875	2399	7446.1	50.8017	0	31.5658	4125.29	994.047	1220.96	20.1281	10417.6	1184.07	2050.55	4776.33
Run 1 Nip	Normal Kidney	Run 1 Nip4 Control p57,Nrf2(ab137550),Nrf1(CST),Nqo1(HPA).czi	136	27681.6	3583	5722.78	21.4408	0	26.3456	2936.59	712.824	1255.44	23.9569	9013.75	742.783	1938.29	2619.07
